# Supplementary material for: Metabolic responses of rice cultivars with different tolerance to combined drought and heat stress under field conditions
Source: Oxford University Press journal article supplement (doi:10.1093/gigascience/giz050), 2019-05-01
Supplement: giz050_response_to_reviewer_comments_revision_1.pdf [file giz050_response_to_reviewer_comments_revision_1.pdf]

## Author's Response To Reviewer Comments

Close

Dear Nicole,

I have made all requested editorial changes. I hope I did not miss anything.

Thanks for your help and best regards

Dirk

Close
